# Supplementary material for: Coupling water fluxes with cell wall mechanics in a multicellular model of plant development
Source: bioRxiv or medRxiv preprint supplement (doi:10.1101/511717), 2019-01-04
Supplement: Supplementary file [file media-1.pdf]

|    |                                                                                                                                                                                               |     |
|----|-----------------------------------------------------------------------------------------------------------------------------------------------------------------------------------------------|-----|
| 1  | <b>Supplementary Information for</b>                                                                                                                                                          | 63  |
| 2  |                                                                                                                                                                                               | 64  |
| 3  |                                                                                                                                                                                               | 65  |
| 4  | <b>Coupling water fluxes with cell wall mechanics in a multicellular model of plant development</b>                                                                                           | 66  |
| 5  |                                                                                                                                                                                               | 67  |
| 6  | <b>Ibrahim Cheddadi, Michel Génard, Nadia Bertin, Christophe Godin</b>                                                                                                                        | 68  |
| 7  |                                                                                                                                                                                               | 69  |
| 8  | <b>Corresponding authors: Ibrahim Cheddadi and Christophe Godin.</b>                                                                                                                          | 70  |
| 9  | <b>E-mail: <a href="mailto:ibrahim.cheddadi@univ-grenoble-alpes.fr">ibrahim.cheddadi@univ-grenoble-alpes.fr</a>, <a href="mailto:christophe.godin@inria.fr">christophe.godin@inria.fr</a></b> | 71  |
| 10 |                                                                                                                                                                                               | 72  |
| 11 |                                                                                                                                                                                               | 73  |
| 12 | <b>This PDF file includes:</b>                                                                                                                                                                | 74  |
| 13 | Figs. S1 to S3                                                                                                                                                                                | 75  |
| 14 | Table S1                                                                                                                                                                                      | 76  |
| 15 | References for SI reference citations                                                                                                                                                         | 77  |
| 16 |                                                                                                                                                                                               | 78  |
| 17 |                                                                                                                                                                                               | 79  |
| 18 |                                                                                                                                                                                               | 80  |
| 19 |                                                                                                                                                                                               | 81  |
| 20 |                                                                                                                                                                                               | 82  |
| 21 |                                                                                                                                                                                               | 83  |
| 22 |                                                                                                                                                                                               | 84  |
| 23 |                                                                                                                                                                                               | 85  |
| 24 |                                                                                                                                                                                               | 86  |
| 25 |                                                                                                                                                                                               | 87  |
| 26 |                                                                                                                                                                                               | 88  |
| 27 |                                                                                                                                                                                               | 89  |
| 28 |                                                                                                                                                                                               | 90  |
| 29 |                                                                                                                                                                                               | 91  |
| 30 |                                                                                                                                                                                               | 92  |
| 31 |                                                                                                                                                                                               | 93  |
| 32 |                                                                                                                                                                                               | 94  |
| 33 |                                                                                                                                                                                               | 95  |
| 34 |                                                                                                                                                                                               | 96  |
| 35 |                                                                                                                                                                                               | 97  |
| 36 |                                                                                                                                                                                               | 98  |
| 37 |                                                                                                                                                                                               | 99  |
| 38 |                                                                                                                                                                                               | 100 |
| 39 |                                                                                                                                                                                               | 101 |
| 40 |                                                                                                                                                                                               | 102 |
| 41 |                                                                                                                                                                                               | 103 |
| 42 |                                                                                                                                                                                               | 104 |
| 43 |                                                                                                                                                                                               | 105 |
| 44 |                                                                                                                                                                                               | 106 |
| 45 |                                                                                                                                                                                               | 107 |
| 46 |                                                                                                                                                                                               | 108 |
| 47 |                                                                                                                                                                                               | 109 |
| 48 |                                                                                                                                                                                               | 110 |
| 49 |                                                                                                                                                                                               | 111 |
| 50 |                                                                                                                                                                                               | 112 |
| 51 |                                                                                                                                                                                               | 113 |
| 52 |                                                                                                                                                                                               | 114 |
| 53 |                                                                                                                                                                                               | 115 |
| 54 |                                                                                                                                                                                               | 116 |
| 55 |                                                                                                                                                                                               | 117 |
| 56 |                                                                                                                                                                                               | 118 |
| 57 |                                                                                                                                                                                               | 119 |
| 58 |                                                                                                                                                                                               | 120 |
| 59 |                                                                                                                                                                                               | 121 |
| 60 |                                                                                                                                                                                               | 122 |
| 61 |                                                                                                                                                                                               | 123 |
| 62 |                                                                                                                                                                                               | 124 |

DRAFT

## 126 1. Calculations for simplified models

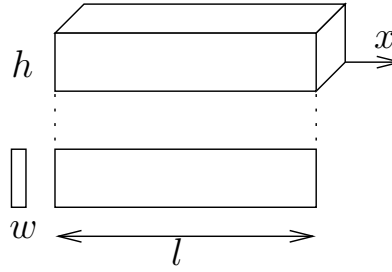

130 Fig. S1. Geometrical parameters of Lockhart-Ortega models: height  $h$  and length  $l$  of the cell, thickness  $w$  of the walls. The two faces orthogonal to the  $x$  axis are referred to as base faces while the four other faces are referred to as lateral faces.

131 **Lockhart-Ortega models.** The equations of cell wall elongation (Eq. (1) in main text) and of water uptake (Eq. 2 in main text) can be linked thanks to the geometry of the cell and the mechanical equilibrium. See Fig. S1 for the geometrical description.

132 First, the cell volume is  $V = h^2 l$  and therefore we find that the relative growth rate of the cell is equal to the strain rate of the walls:

$$133 \dot{\gamma} = \frac{1}{V} \frac{dV}{dt} = \frac{1}{l} \frac{dl}{dt} = \dot{\epsilon}. \quad [S1]$$

134 Then, we consider the balance of forces on the base faces (see Fig. S1 for the nomenclature); their area is  $h \times h$  and they are submitted to a total pressure force  $Ph^2$  in the direction of the main axis of the cell, balanced by the tension from the lateral walls. Let  $\sigma$  be the common (scalar) stress in the walls; the wall thickness is  $w$  so their cross section is  $h \times w$  and therefore they each exert a force  $\sigma hw$  on the base faces. To be coherent with the bidimensional model we propose, we consider that the top and bottom lateral faces bear no stress and the balance of forces leads to

$$135 Ph^2 = 2\sigma hw$$

136 and therefore the balance of forces leads to  $P = 2\frac{w}{h}\sigma$ . Finally, thanks to this equation and the identity Eq. (S1), the Lockhart-Ortega model (eqs. (1), (3) in main text) is reduced to the following differential equation for  $P$ :

$$137 \frac{1}{E} \frac{dP}{dt} + \phi^w (P - P^Y)_+ = \phi^a (P^M - P), \quad [S2]$$

138 where  $\phi^a = \frac{AL^a}{V}$  has been introduced in the main text; in order to keep the calculations as simple as possible, Lockhart made the assumption that the area of the base faces is negligible compared to the area  $A = 4hl$  of the lateral faces (see Fig. S1). Note that the cell volume is  $V = h^2 l$  and therefore the ratio  $A/V = 4/h$  is constant.

139 Let's study the transient behaviour of equation Eq. (S2), from an initial condition  $P(t = 0) = 0$ :

- 140 • Elastic regime: first,  $P$  is below  $P^Y$  and the plastic rate is zero; Eq. (S2) becomes

$$141 \lambda^a \frac{dP}{dt} + P = P^M,$$

142 where  $\lambda^a = \frac{1}{\phi^a E}$  is a characteristic time. The solution is

$$143 P = P^M (1 - \exp(-t/\lambda^a)).$$

144 The relative growth rate is

$$145 \dot{\gamma} = \phi^a P^M \exp(-t/\lambda^a).$$

- 146 • Plastic regime: the plastic regime starts when  $P = P^Y$ , at  $t^0 = \lambda^a \log\left(\frac{P^M}{P^M - P^Y}\right)$ . The equation Eq. (S2) becomes:

$$147 \frac{1}{E} \frac{dP}{dt} + (\phi^a + \phi^w)P = \phi^a P^M + \phi^w P^Y,$$

148 and equivalently

$$149 \lambda^{aw} \frac{dP}{dt} + P = \alpha^a P^M + (1 - \alpha^a)P^Y,$$

249 where  $\lambda^{aw} = \frac{1}{(\phi^a + \phi^w)E}$  is a characteristic time. The solution is

$$250 \quad P = \alpha^a P^M + (1 - \alpha^a) P^Y - \alpha^a (P^M - P^Y) \exp((t^0 - t)/\lambda^{aw}), \quad [S3] \quad 313$$

$$251 \quad \dot{\gamma} = \frac{\phi^a \phi^w}{\phi^a + \phi^w} (P^M - P^Y) - \frac{(\phi^a)^2}{\phi^a + \phi^w} (P^M - P^Y) \exp((t^0 - t)/\lambda^{aw}). \quad [S4] \quad 314$$

252  
253  
254  
255 The stationary solution is

$$256 \quad P^* = \alpha^a P^M + (1 - \alpha^a) P^Y \quad [S5] \quad 318$$

$$257 \quad \dot{\gamma}^* = \frac{\phi^a \phi^w}{\phi^a + \phi^w} (P^M - P^Y). \quad [S6] \quad 319$$

### 261 Single polygonal cell.

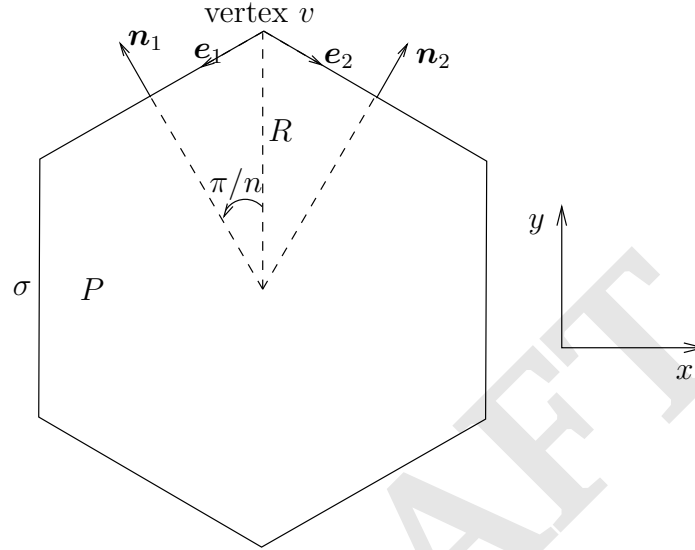

262  
263  
264  
265  
266  
267  
268  
269  
270  
271  
272  
273  
274  
275  
276  
277  
278  
279  
280  
281  
282 We consider a regular convex polygon of radius  $R$  with  $n$  edges that represents a cell.

283 **Mechanical equilibrium.** Let  $\sigma$  be the stress in the walls and  $P$  the pressure inside the cell; the outside pressure is set to zero.  
284 The length of the edges is  $2R \sin(\pi/n)$ , and the walls are given a height  $h$  and a thickness  $w$ ; therefore the stresses are exerted  
285 on a surface  $hw$ ; the contribution of pressure on vertex  $v$  is  $\frac{1}{2} P 2hR \sin(\pi/n) (\mathbf{n}_1 + \mathbf{n}_2)$ . Therefore, the balance of forces on  
286 vertex  $v$  writes:

$$287 \quad \frac{1}{2} P 2hR \sin(\pi/n) (\mathbf{n}_1 + \mathbf{n}_2) + \sigma hw (\mathbf{e}_1 + \mathbf{e}_2) = 0. \quad 350$$

288  
289  
290 The normal vectors are

$$291 \quad \mathbf{n}_1 = (-\sin(\pi/n), \cos(\pi/n)) \quad \text{and} \quad \mathbf{n}_2 = (\sin(\pi/n), \cos(\pi/n)). \quad 351$$

292  
293 The tangent vectors are

$$294 \quad \mathbf{e}_1 = (-\cos(\pi/n), -\sin(\pi/n)) \quad \text{and} \quad \mathbf{e}_2 = (\cos(\pi/n), -\sin(\pi/n)). \quad 352$$

295 By symmetry, the  $x$  component of the resulting force is zero; the projection of the balance of forces on  $y$  axis yields

$$296 \quad 2PhR \sin(\pi/n) \cos(\pi/n) - 2\sigma hw \sin(\pi/n) = 0, \quad 353$$

297  
298  
299 and

$$300 \quad P = \frac{w}{R \cos(\pi/n)} \sigma. \quad [S7] \quad 354$$

301  
302 When  $n \rightarrow \infty$ ,  $\cos(\pi/n) \rightarrow 1$  and we recover the Laplace law.

303  
304 **Flux equation.** The surface of the polygon is

$$305 \quad S_n = n \times 2R \sin(\pi/n) R \cos(\pi/n) / 2 = R^2 n \sin(\pi/n) \cos(\pi/n). \quad 355$$

306  
307 The volume of the cell is  $V = S_n h$ , so the volume variation is

$$308 \quad \frac{dV}{dt} = 2hR \frac{dR}{dt} n \sin(\pi/n) \cos(\pi/n). \quad 356$$

309  
310

373 The perimeter of the polygon is  $n \times 2R \sin(\pi/n)$  so the lateral area of the cell is

$$374 \quad A = 2nhR \sin(\pi/n). \quad 435$$

376 Note that the ratio  $A/V$  is not constant:

$$377 \quad \frac{A}{V} = \frac{2}{R \cos(\pi/n)}. \quad 438$$

379 Finally, the flux equation writes

$$380 \quad 2hR \frac{dR}{dt} n \sin(\pi/n) \cos(\pi/n) = n2hR \sin(\pi/n) L(P^M - P), \quad 439$$

383 which yields

$$384 \quad \frac{dR}{dt} = \frac{L}{\cos(\pi/n)} (P^M - P) \quad [S8] \quad 440$$

387 **Wall rheology.** Let  $\varepsilon^e$  be the elastic deformation of the walls; it is related to the stress by the constitutive equation  $\sigma = E\varepsilon^e$  449  
 388 where  $E$  is the elastic modulus. The length of the edges is  $l = 2R \sin(\pi/n)$  and therefore the strain rate of the edges is 450  
 389  $\frac{1}{l} \frac{dl}{dt} = \frac{1}{R} \frac{dR}{dt}$ . The rheological behaviour of the walls is given by 451

$$390 \quad \frac{1}{R} \frac{dR}{dt} = \frac{d\varepsilon^e}{dt} + \Phi^w E \max(0, \varepsilon^e - \varepsilon^Y), \quad [S9] \quad 452$$

393 or equivalently

$$394 \quad \frac{1}{R} \frac{dR}{dt} = \frac{1}{E} \frac{d\sigma}{dt} + \Phi^w \max(0, \sigma - \sigma^Y), \quad [S10] \quad 453$$

396 where  $\varepsilon^Y$  (resp.  $\sigma^Y$ ) is a yield elastic deformation (resp. stress). 454

398 **Numerical results.** The problem to solve is reduced to a set of two differential equations. It is numerically solved with the 460  
 399 `odeint` routine from the `python` library `scipy`. 461

400 We study the growth of a hexagonal cell ( $n = 6$ ) growing from an initial state where the elastic deformation of the walls is 462  
 401 set to the threshold value, in order to bypass the pure elastic regime; computations are run over a long time scale. We want to 463  
 402 study how this models compares to Lockhart-Ortega when the relative importance of fluxes and wall synthesis varies; to this 464  
 403 end, we run three simulations with  $\alpha^a = 0.1, 0.5, 0.9$ . Let  $R_0 = 10\mu\text{m}$  be the initial radius of the cell, then  $P^Y = \frac{w}{R_0 \cos(\pi/6)} E\varepsilon^Y$  465  
 404 is a representative value for the yield turgor of a hexagonal cell. The value  $\varepsilon^Y = 0.1$  is chosen accordingly to experimental 466  
 405 observations where wall deformations can be of the order of 10%; then we choose  $E$  such that  $P^Y = 0.5$  MPa, which sets an 467  
 406 order of magnitude for the initial turgor of the cell, close to observed experimental data. We choose  $P^M = 0.7$  MPa so that it 468  
 407 is above  $P^Y$ . Finally, we can use the Lockhart's prediction Eq. (S6) as an order of magnitude of the relative growth rate; we 469  
 408 choose  $\dot{\gamma}^* = 2\% \cdot \text{h}^{-1}$ . Then, a given value of  $\alpha^a$  (evaluated with the initial area of the cell) sets a unique value of  $L^a$  and  $\phi^w$ . 470

409 At the onset of the simulation, walls start to extend irreversibly and plastic growth occurs. Fig. S2a,c shows that the volume 471  
 410 increases faster for large values of  $\alpha^a$ , although we have chosen the parameters so that the Lockhart model predicts a constant 472  
 411 and common value of  $\dot{\gamma}$ . Fig. S2b shows that  $P$  is initially close to Lockhart predictions  $P^*$  but decreases fastly to zero; the 473  
 412 fast decrease of  $P$  coincides with peaks of  $\dot{\gamma}$  (Fig. S2c) above the value  $\dot{\gamma}^*$  with a higher peak for larger values of  $\alpha^a$ ; the elastic 474  
 413 deformation  $\varepsilon^e$  (Fig. S2d) is not constant either, with a large peak above the Lockhart-Ortega prediction for  $\alpha^a = 0.9$ . For all 475  
 414 values of  $\alpha^a$ ,  $\varepsilon^e$  converges toward the threshold  $\varepsilon^Y$ . 476

416 **Two-cells model.** The geometry and notations of the two-cells model is recalled in Fig. S3. Gathering the flux equation (Eq. 8 478  
 417 from main text) and the wall mechanics equation (Eq. 1 from main text) with  $\frac{dP}{dt} = 0$ , we get 479

$$418 \quad \phi^a (P^M - P_0) + \frac{\phi^s}{2} (P_1 - P_0) - \phi^w (P_0 - P_0^Y)_+ = 0 \quad [S11] \quad 480$$

$$420 \quad \phi^a (P^M - P_1) - \frac{\phi^s}{2} (P_1 - P_0) - \phi^w (P_1 - P_1^Y)_+ = 0. \quad [S12] \quad 482$$

423 First, we assume that both cells are growing ( $P_i > P_i^Y, i = 0, 1$ ). 485

424 **First regime:**  $P_i > P_i^Y, i = 0, 1$ . Adding Eq. (S11) and Eq. (S12) we get: 486

$$425 \quad \bar{P} = \alpha^a P^M + (1 - \alpha^a) \bar{P}^Y, \quad [S13] \quad 487$$

426 where  $\alpha^a = \frac{\phi^a}{\phi^a + \phi^w}$ ,  $\bar{P} = \frac{P_0 + P_1}{2}$ . With Eq. 1 from main text, we get 488

$$427 \quad \bar{\gamma} = \frac{\phi^a \phi^w}{\phi^a + \phi^w} (P^M - \bar{P}^Y), \quad [S14] \quad 489$$

428 where  $\bar{\gamma} = \frac{\dot{\gamma}_0 + \dot{\gamma}_1}{2}$ . Therefore, the gathering of two cells behaves the same as one cell if one considers the mean values. 490  
 429 491  
 430 492  
 431 493  
 432 494  
 433 495  
 434 496

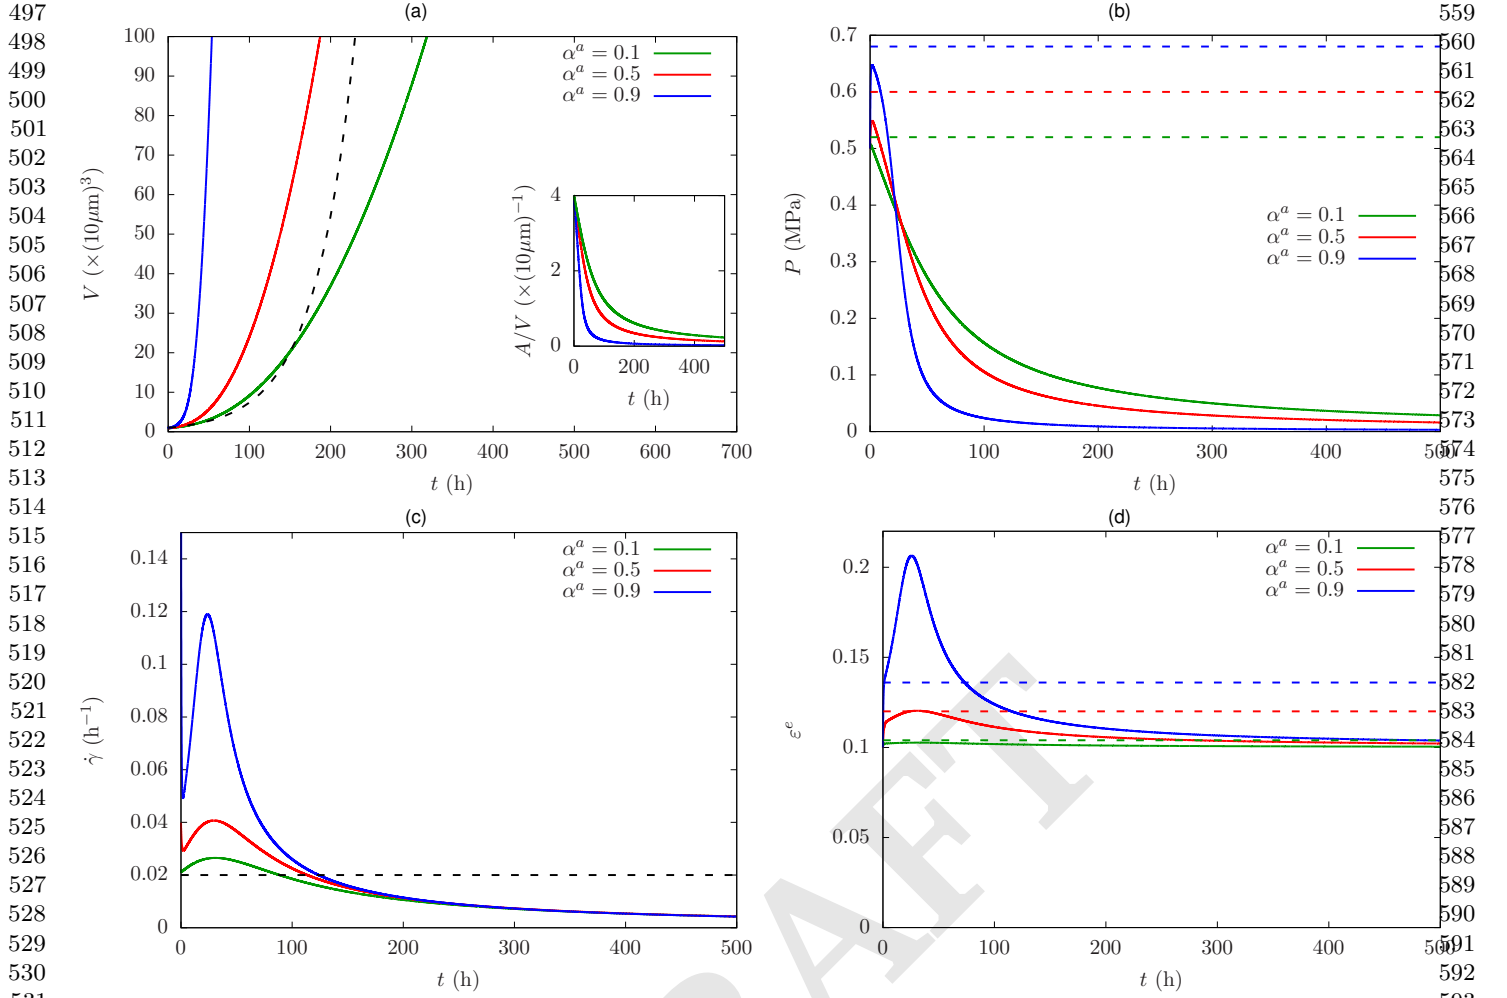

**Fig. S2.** Growth of a single hexagonal cell for three different values of  $\alpha^a$ : time evolution of volume (inset: ratio area/volume) (a), turgor (b), relative growth rate (c), and elastic deformation of the walls (d). The dashed lines correspond to the solution of the Lockhart model; note that the chosen sets of parameters lead to the constant and equal value  $\dot{\gamma}^* = 2\% \cdot \text{h}^{-1}$ , and to the same evolution of volume.

Then, we examine the heterogeneities in turgor and growth rate. Subtracting Eq. (S11) to Eq. (S12), we get

$$\Delta P = \frac{\phi^w}{\phi^a + \phi^s + \phi^w} \Delta P^Y.$$

Let

$$\alpha^s = \frac{\phi^s}{\phi^s + \phi^a}.$$

Then the previous expression becomes

$$\Delta P = \frac{(1 - \alpha^a)(1 - \alpha^s)}{1 - \alpha^s + \alpha^a \alpha^s} \Delta P^Y. \quad [\text{S15}]$$

As  $(1 - \alpha^a)(1 - \alpha^s) = 1 - \alpha^a - \alpha^s + \alpha^a \alpha^s < 1 - \alpha^s + \alpha^a \alpha^s$ , we find that turgor difference  $\Delta P$  cannot exceed the value  $\Delta P^Y$ . When  $\alpha^s = 0$  (symplasmic fluxes negligible with respect to apoplasmic ones), then  $\Delta P = (1 - \alpha^a) \Delta P^Y$ ; when  $\alpha^s > 0$ , symplasmic fluxes tend to reduce the turgor heterogeneity between cells.

With Eq. 7 from main text we get then

$$\Delta \dot{\gamma} = \frac{(\phi^a + \phi^s) \phi^w}{\phi^a + \phi^s + \phi^w} \Delta P^Y, \quad [\text{S16}]$$

where  $\Delta \dot{\gamma} = \frac{\dot{\gamma}_0 - \dot{\gamma}_1}{2}$ . Note that this expression is valid iff  $P_1 > P_1^Y$  or equivalently  $\dot{\gamma}_1 > 0$ . The limit  $\dot{\gamma}_1 = 0$  corresponds to the situation where cell 0 is growing in such a way that it prevents cell 1 to grow because of the symplasmic fluxes between them. We examine how this situation can occur depending on the values of the symplasmic conductivity  $\phi^s$  and the other parameters.

621  
622  
623  
624  
625  
626  
627  
628  
629  
630  
631  
632  
633  
634  
635  
636  
637  
638  
639  
640  
641  
642  
643  
644  
645  
646  
647  
648  
649  
650  
651  
652  
653  
654  
655  
656  
657  
658  
659  
660  
661  
662  
663  
664  
665  
666  
667  
668  
669  
670  
671  
672  
673  
674  
675  
676  
677  
678  
679  
680  
681  
682

683  
684  
685  
686  
687  
688  
689  
690  
691  
692  
693  
694  
695  
696  
697  
698  
699  
700  
701  
702  
703  
704  
705  
706  
707  
708  
709  
710  
711  
712  
713  
714  
715  
716  
717  
718  
719  
720  
721  
722  
723  
724  
725  
726  
727  
728  
729  
730  
731  
732  
733  
734  
735  
736  
737  
738  
739  
740  
741  
742  
743  
744

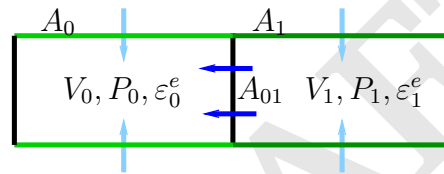

**Fig. S3.** Two cells model: symplasmic flows (dark blue arrows) occur through the contact surface  $A_{01}$ ; apoplasmic flows (light blue arrows) occur through the surfaces  $A_0$  and  $A_1$ . Growth is restricted to the green edges: cell 0 (in dark green) has stiffer walls than cell 1 (in light green).

745 We find that

$$\begin{aligned}
746 & P_1 > P_1^Y \iff \frac{\phi^a + \phi^s}{\phi^a + \phi^s + \phi^w} \frac{\Delta P^Y}{P^M - \bar{P}^Y} < \frac{\phi^a}{\phi^a + \phi^w} \\
747 & \\
748 & \\
749 & \iff \frac{\alpha^a}{1 - (1 - \alpha^s)\alpha^a} \rho < \alpha^a \\
750 & \\
751 & \iff \alpha^s < \frac{1 - \rho}{1 - \alpha^a}. \\
752 & \\
753 &
\end{aligned}$$

754 For instance,  $P_0^Y = 0.25$  MPa,  $P_1^Y = 0.5$  MPa, and  $P^M = 0.625$  MPa yields  $\rho = 0.5$ . The hypothesis of this study  
755 ( $P_0^Y < P_1^Y < P^M$ ) corresponds to the condition  $\rho \in [0, 1]$ . Note that if  $\alpha^a > \rho$ , then  $\frac{1-\rho}{1-\alpha^a} > 1$ , and the condition is verified  
756 whatever the value of  $\alpha^s$ ; if  $\alpha^s = 1 - \rho$ , the condition is equivalent to  $\alpha^a > 0$ , which is also always verified. Fig. S3a)  
757 recapitulates the regions of the parameters space  $\alpha^a \times \alpha_s$  where the condition is verified, for different values of  $\rho$ . The size of  
758 the region  $\dot{\gamma}_1 = 0$  increases as  $\rho$  gets closer to 1.

759 **Second regime:**  $P_0 > P_0^Y$  and  $P_1 < P_1^Y$ . In this case, eqs. Eq. (S11) and Eq. (S12) turn into

$$761 \quad \phi^a (P^M - P_0) + \frac{\phi^s}{2} (P_1 - P_0) - \phi^w (P_0 - P_0^Y) = 0 \quad [S17] \quad 823$$

$$762 \quad \phi^a (P^M - P_1) - \frac{\phi^s}{2} (P_1 - P_0) = 0. \quad [S18] \quad 824$$

763 Eq. (S18) leads to

$$764 \quad P_1 = (1 - \tilde{\alpha}^s)P^M + \tilde{\alpha}^s P_0, \quad [S19] \quad 825$$

765 where  $\tilde{\alpha}^s = \frac{\phi^s}{2\phi^a + \phi^s}$ . Adding eqs. Eq. (S17) and Eq. (S18) leads to

$$766 \quad P_0(\phi^a + \phi^w) = 2\phi^a P^M + \phi^w P_0^Y - \phi^a((1 - \tilde{\alpha}^s)P^M + \tilde{\alpha}^s P_0), \quad 826$$

767 then,

$$768 \quad P_0(\phi^a(1 + \tilde{\alpha}^s) + \phi^w) = \phi^a(1 + \tilde{\alpha}^s)P^M + \phi^w P_0^Y, \quad 827$$

769 and finally

$$770 \quad P_0 = \alpha^{as} P^M + (1 - \alpha^{as}) P_0^Y, \quad [S20] \quad 828$$

771 where

$$772 \quad \alpha^{as} = \frac{\phi^{as}}{\phi^{as} + \phi^w} \quad \text{and} \quad \phi^{as} = \phi^a(1 + \tilde{\alpha}^s). \quad 829$$

773 Hence, thanks to the symplasmic fluxes from its neighbour cell 1, cell 0 benefits from an enhanced access to the apoplasmic  
774 fluxes by a factor  $\phi^{as}/\phi^a = 1 + \tilde{\alpha}^s$ . Then, from Eq. 1 in main text, the relative growth rate of cell 0 is

$$775 \quad \dot{\gamma}_0 = \frac{\phi^{as} \phi^w}{\phi^{as} + \phi^w} (P^M - P_0^Y). \quad [S21] \quad 830$$

776 By hypothesis, the growth rate of cell 1 is zero, and we can compute the heterogeneity in turgor: from Eq. (S19), we find that

$$777 \quad \Delta P = \frac{1 - \tilde{\alpha}^s}{2} (P^M - P_0), \quad 831$$

778 and hence

$$779 \quad \Delta P = \frac{1}{2} (1 - \tilde{\alpha}^s) (1 - \alpha^{as}) (P^M - P_0^Y). \quad [S22] \quad 832$$

## 780 2. Numerical resolution of the 2D multicellular model

781 **Structure of the mathematical problem.** Thanks to the geometrical constraint of uni-directional growth, the Lockhart-Ortega  
782 is very simple to resolve. The identity between the relative growth rate of the cell and the strain rate of the walls allows to  
783 couple the equation that describes fluxes, and the equation that describes walls synthesis. Then the stress in the walls and the  
784 pressure inside the cell are linked by the mechanical equilibrium. Finally there is only one independent variable (pressure for  
785 instance) and the model can be solved analytically.

786 Conversely, in the bidimensionnal model we propose, the properties of a given wall (elongation rate and elastic deformation)  
787 cannot be directly linked to the properties of the adjacent cells (growth rate and pressure). Hence a new strategy has to be  
788 developed. First, we emphasize the strong coupling between fluxes and mechanics: the motion of the vertices is prescribed by  
789 the mechanical equilibrium (Eq. 11 from main text) between pressure forces and elastic forces; meanwhile, a displacement  
790 of the vertices can cause a variation of volume of several cells, which has to be balanced by water fluxes (Eq. 10 from main  
791 text); water fluxes are limited by the finite permeability of the walls, which sets a constraint on possible variations of volume.  
792 Similarly, any variation in the length of the walls leads to a modification of their elastic deformation (Eq. 7 from main text).

Another way to understand this problem is to consider it as the minimization of mechanical energy (mechanical equilibrium Eq. 11 from main text) under two constraints on the position of the vertices, through the volumes of the cells (Eq. 10 from main text) and the lengths of the edges (Eq. 7 from main text). This kind of problem is often encountered in mechanics, *e.g.* solid friction, contact mechanics, or incompressible fluid mechanics; a powerful theoretical and practical tool to solve this is the method of lagrangian multipliers. For instance, in the context of incompressible fluid mechanics, the constraint of volume conservation is relaxed by pressure that acts as a lagrangian multiplier. Physically, the pressure adjusts itself so that both the constraint and the mechanical equilibrium are satisfied. The model we propose exhibits the same structure, as pressure will adjust to both fluxes and mechanical constraints. However, the system here is discrete, and the flux equation (Eq. 10 in main text) is linear with respect to pressure, so it can be reduced to a linear system. We will take advantage of this for the resolution of the model.

### Resolution algorithm.

**Volumes and lengths as functions of the positions of the vertices.** First, we express volumes and lengths as functions of the positions of the vertices. Let  $N_v$  be the number of vertices and  $\mathbf{X} \in \mathbb{R}^{2N_v}$  the vector of the positions of all the vertices. The volume of a cell  $i$  is  $V_i = S_i h$  where  $S_i$  is its surface. As cells are non intersecting polygons, their signed surface is given by the general formula

$$S_i = \frac{1}{2} \sum_{k=0}^{n_i-1} (x_k y_{k+1} - x_{k+1} y_k), \quad [\text{S23}]$$

where  $n_i$  is the number of vertices of cell  $i$ ,  $(x_k, y_k)_{k=0, \dots, n_i-1}$  are the coordinates of the vertices of the cell  $i$  in counterclockwise order, and we set  $(x_{n_i}, y_{n_i}) = (x_0, y_0)$ . Let  $N_c$  be the number of cells and  $\mathbf{V} \in \mathbb{R}^{N_c}$  the vector of all the cells volumes; thanks to Eq. (S23), it can be expressed as a function of  $\mathbf{X}$  and its gradient  $\nabla_{\mathbf{X}} \mathbf{V}$  with respect to  $\mathbf{X}$  can be computed. Then the time derivative of  $\mathbf{V}$  expresses as

$$\frac{d\mathbf{V}}{dt} = \nabla_{\mathbf{X}} \mathbf{V} \frac{d\mathbf{X}}{dt}.$$

Note here that  $\nabla_{\mathbf{X}} \mathbf{V}$  is a  $N_c \times 2N_e$  matrix and  $\frac{d\mathbf{X}}{dt}$  is a  $2N_e$  vector, so their product is well defined and has the correct dimension.

Similarly, the length of a segment  $k$  with two vertices  $v_1 = (x_1, y_1)$  and  $v_2 = (x_2, y_2)$  at its ends is

$$l_k = \sqrt{(x_1 - x_2)^2 + (y_1 - y_2)^2}. \quad [\text{S24}]$$

Let  $N_e$  be the number of edges and  $\mathbf{l} \in \mathbb{R}^{N_e}$  the vector of all the edges lengths; thanks to Eq. (S24), it can be expressed as a function of  $\mathbf{X}$  and its gradient  $\nabla_{\mathbf{X}} \mathbf{l}$  with respect to  $\mathbf{X}$  can be computed. Then the time derivative of  $\mathbf{l}$  expresses as

$$\frac{d\mathbf{l}}{dt} = \nabla_{\mathbf{X}} \mathbf{l} \frac{d\mathbf{X}}{dt}.$$

**Time discretisation.** Time is discretized using a fixed time step  $\Delta t$  and the time derivatives are approximated by the 1st order Euler scheme, for instance:

$$\frac{d\mathbf{X}}{dt}(t) \approx \frac{\mathbf{X}(t + \Delta t) - \mathbf{X}(t)}{\Delta t}.$$

Let  $\boldsymbol{\varepsilon} \in \mathbb{R}^{N_e}$  be the vector of all the elastic deformations of the edges. Let  $\mathbf{X}^0 = \mathbf{X}(0)$  and  $\boldsymbol{\varepsilon}^0 = \boldsymbol{\varepsilon}(0)$  be some initial conditions. We construct successive approximations of the solution at times  $t_n = n\Delta t$  for  $n > 0$  by solving at each time step the mechanical equilibrium (Eq. 11 from main text) along with the discretized versions of flux (Eq. 10 from main text) and wall rheology (Eq. 7 from main text) equations: let  $\mathbf{P} \in \mathbb{R}^{N_c}$  be the vector of all the cells pressures; these equations can be written in a matrix form:

$$\nabla_{\mathbf{X}} \mathbf{V}(\mathbf{X}^{n+1}) \frac{\mathbf{X}^{n+1} - \mathbf{X}^n}{\Delta t} = M_P \mathbf{P}^{n+1} + \mathbf{b}_P, \quad [\text{S25}]$$

$$\frac{\boldsymbol{\varepsilon}^{n+1} - \boldsymbol{\varepsilon}^n}{\Delta t} + \boldsymbol{\beta}^n \boldsymbol{\varepsilon}^{n+1} = \frac{1}{\mathbf{l}(\mathbf{X}^{n+1})} \nabla_{\mathbf{X}} \mathbf{l}(\mathbf{X}^{n+1}) \frac{\mathbf{X}^{n+1} - \mathbf{X}^n}{\Delta t}. \quad [\text{S26}]$$

where  $M_P$  is a  $N_c \times N_e$  matrix, with the following non-zero coefficients:

$$M_P(i, i) = A_i L_i^a - \sum_{j \in n(i)} A_{ij} L_{ij}^s, \quad \forall i = 1, \dots, N_c,$$

$$M_P(i, j) = A_{ij} L_{ij}^s, \quad \forall i = 1, \dots, N_c, \quad \forall j \in n(i),$$

with  $\mathbf{b}_P \in \mathbb{R}^{N_c}$  is defined by its coefficients

$$\mathbf{b}_p(i) = A_i L_i^a P^M, \quad \forall i = 1, \dots, N_c.$$

Note here that the model implies no time derivative of the pressure, so that  $\forall n > 0$ ,  $\mathbf{P}^{n+1}$  can be computed without the knowledge of  $\mathbf{P}^n$ , and the initial value of the pressure is not needed.

In addition,  $\boldsymbol{\beta}^n$  is the  $N_e \times N_e$  diagonal matrix with components  $\beta^n(k, k) = \frac{2w}{h} \phi_k^w E_k \max\left(0, \frac{\varepsilon_k^n - \varepsilon_k^Y}{\varepsilon_k^n}\right)$  for  $k = 1, \dots, N_e$ , and for the purpose of notation,  $\frac{1}{\mathbf{l}}$  is the  $N_e \times N_e$  diagonal matrix with components  $1/l_k$ . Note here that the variables  $\boldsymbol{\beta}^n$  are taken at time step  $n$  so that they are considered as constants at time step  $n + 1$  and the equation Eq. (S26) is linear with respect to the unknown  $\boldsymbol{\varepsilon}^{n+1}$ .



993 **Pressure and elastic deformation as functions of the position of the vertices.** Thanks to this time discretization, we see 1055  
 994 that at each time step, the unknown pressure  $\mathbf{P}^{n+1}$  and elastic deformation  $\boldsymbol{\varepsilon}^{n+1}$  are defined through the linear equations 1056  
 995 Eq. (S25) and Eq. (S26) which can be easily inverted, which allows to express both these variables as functions of the spatial 1057  
 996 unknown  $\mathbf{X}^{n+1}$ . 1058

997 First, from equation Eq. (S25): 1059

$$998 \quad P(\mathbf{X}^{n+1}) = \frac{1}{\Delta t} M_P^{-1} \nabla_{\mathbf{X}} \mathbf{V}(\mathbf{X}^{n+1}) \mathbf{X}^{n+1} - M_P^{-1} \left( \frac{1}{\Delta t} \nabla_{\mathbf{X}} \mathbf{V}(\mathbf{X}^{n+1}) \mathbf{X}^n - \mathbf{b}_P \right). \quad [S27] \quad 1060$$

1001 Then, using Eq. (S26): 1063

$$1002 \quad \boldsymbol{\varepsilon}(\mathbf{X}^{n+1}) = \frac{1}{\Delta t} M_\varepsilon^{-1} \frac{1}{l(\mathbf{X}^{n+1})} \nabla_{\mathbf{X}} l(\mathbf{X}^{n+1}) \mathbf{X}^{n+1} - \frac{1}{\Delta t} M_\varepsilon^{-1} \left( \frac{1}{l(\mathbf{X}^{n+1})} \nabla_{\mathbf{X}} l(\mathbf{X}^{n+1}) \mathbf{X}^n - \boldsymbol{\varepsilon}^n \right), \quad [S28] \quad 1064$$

1005 where  $M_\varepsilon = \frac{1}{\Delta t} I_{N_e} + \beta^n$ . 1065

1006 **Structure of the resolution algorithm** Thanks to the two previous steps, we are now able to propose a algorithm for the resolution 1066  
 1007 of the model. 1067

- 1008 • Initialization: Define  $\mathbf{X}^0 \in \mathbb{R}^{2N_v}$  and  $\boldsymbol{\varepsilon}^0 \in \mathbb{R}^{N_e}$  1072
- 1009 •  $\forall n \geq 0$ , assuming  $\mathbf{X}^n$  and  $\boldsymbol{\varepsilon}^n$  are known, let  $\mathbf{F}^n : \mathbb{R}^{2N_v} \rightarrow \mathbb{R}^{2N_v}$  be the function such that  $\forall v = 0, \dots, N_v - 1$ , 1073

$$1010 \quad \begin{pmatrix} F_{2v+1}^n(\mathbf{X}) \\ F_{2v+2}^n(\mathbf{X}) \end{pmatrix} = \frac{1}{2} \sum_{k \in f(v)} \Delta_k P(\mathbf{X}) A_k(\mathbf{X}) \mathbf{n}_k(\mathbf{X}) + \sum_{k \in f(v)} E_k \varepsilon_k^e(\mathbf{X}) a_k(\mathbf{X}) \mathbf{e}_{k,v}(\mathbf{X}), \quad 1074$$

1011 where  $F_k^n$  is the  $k$ -th component of  $\mathbf{F}^n$ , and with the same notations as in Eq. 11 from main text;  $P(\mathbf{X})$  and  $\boldsymbol{\varepsilon}(\mathbf{X})$  are 1075  
 1012 the functions of  $\mathbf{X}$  given by Eq. (S27) and Eq. (S28). Then, the new position of the vertices  $\mathbf{X}^{n+1}$  is the solution of the 1076  
 1013 equation 1077

$$1014 \quad \mathbf{F}^n(\mathbf{X}) = 0. \quad [S29] \quad 1078$$

1015 **Resolution of Eq. (S29).** This is the last and most critical step of the resolution algorithm. The problem of computing the roots 1079  
 1016 of a multidimensional non linear function is often encountered in the mechanical modelling of complex multibody systems, 1080  
 1017 and a method of choice for the resolution is the Newton algorithm [1]. It is a iterative process which derives from a Taylor 1081  
 1018 expansion about a current point  $\mathbf{u}^k$ : 1082

$$1019 \quad \mathbf{F}^n(\mathbf{u}^{k+1}) = \mathbf{F}^n(\mathbf{u}^k) + J(\mathbf{u}^k)(\mathbf{u}^{k+1} - \mathbf{u}^k) + o(\mathbf{u}^{k+1} - \mathbf{u}^k), \quad 1083$$

1020 where  $J(\mathbf{u}^k)$  is the jacobian matrix of function  $\mathbf{F}^n$ . The new value  $\mathbf{u}^{k+1}$  is obtained by setting the right-hand side to zero and 1084  
 1021 neglecting the high order term, and then solving the linear system: 1085

$$1022 \quad J(\mathbf{u}^k) \delta \mathbf{u}^k = -\mathbf{F}^n(\mathbf{u}^k), \mathbf{u}^{k+1} = \mathbf{u}^k + \delta \mathbf{u}^k. \quad 1086$$

1023 With the initial value  $\mathbf{u}^0 = \mathbf{X}^n$ , iterations are run until a stopping criterium is met, for instance 1087

$$1024 \quad \frac{\|\mathbf{F}^n(\mathbf{u}^k)\|}{\|\mathbf{F}^n(\mathbf{u}^0)\|} \leq tol_{res}, \quad [S30] \quad 1088$$

1025 where  $tol_{res} > 0$  is a fixed value. Then one can set  $\mathbf{X}^{n+1} = \mathbf{u}^k$ . 1089

1026 The computation of the jacobian matrix  $J(\mathbf{u}^k)$  is non trivial here because of the numerous non-linearities of function  $\mathbf{F}^n$ . 1090  
 1027 Therefore we have chosen to use the Newton-Krylov variant of this algorithm, that avoids the computation of the jacobian 1091  
 1028 without losing efficiency [1]. 1092

1029 However, Newton methods in general have only local convergence properties, which means that they need an initial guess 1093  
 1030 close enough to the solution to be able to converge. This is critical for instance in the first time step of the simulation, because 1094  
 1031 the initial conditions might be far from equilibrium, but also for further time steps. This lack of global convergence properties 1095  
 1032 is often dealt with by adding a friction term proportional to the velocity and hence to the time derivative of the positions. 1096  
 1033 With this method, the problem to solve at each time step becomes after time discretization: find  $\mathbf{X}$  such that 1097

$$1034 \quad \mathbf{G}(\mathbf{X}) = \mathbf{F}^n(\mathbf{X}) - c \frac{\mathbf{X} - \mathbf{X}^n}{\Delta t} = 0, \quad 1098$$

1035 where  $c > 0$  is a friction coefficient. This new problem is easier to solve with the Newton method, all the more that  $c$  is large. 1099  
 1036 However, the root of  $\mathbf{G}$  might not satisfy the condition Eq. (S30), and in addition its value depends on the value of  $c$ . Therefore, 1100  
 1037 instead of applying the Newton method to the function  $\mathbf{G}$ , we perform the following iterative process: 1101

- 1038 • Initialization:  $\mathbf{u}^0 = \mathbf{X}^n$  1102

1117 • Assuming  $\mathbf{u}^k$  is known, compute  $\mathbf{u}^{k+1}$  as the solution of 1179  
 1118  $\mathbf{G}^k(\mathbf{u}^{k+1}) = 0,$  [S31] 1180  
 1119

1120 where  $\mathbf{G}^k(\mathbf{u}^{k+1}) = \mathbf{F}^n(\mathbf{u}^{k+1}) - c^k \frac{\mathbf{u}^{k+1} - \mathbf{u}^k}{\Delta t}$ , and the value  $c^k > 0$  will be adjusted to ensure a robust convergence (see 1182  
 1121 below). This solution is computed thanks to the Newton method, with the tolerance  $tol_{res}/10$  in the stopping criterium. 1184  
 1122

1123 • The iterations are stopped when  $\frac{\|\mathbf{F}^n(\mathbf{u}^k)\|}{\|\mathbf{F}^n(\mathbf{u}^0)\|} \leq tol_{res}$ . Then the choice  $\mathbf{X}^{n+1} = \mathbf{u}^k$  is an approximate solution of Eq. (S29). 1185  
 1124

1125 In this algorithm, the choice of the friction coefficient  $c^k$  is not straightforward: a large value would ensure the convergence 1187  
 1126 of subproblem Eq. (S31), but it would also slow down the convergence toward the solution of problem Eq. (S29). To avoid 1188  
 1127 this, we choose a large initial value  $c^0$  and decrease it with the law  $c^{k+1} = c^k/2$ . This choice ensures a robust behaviour of the 1189  
 1128 algorithm. 1190  
 1129

### 1130 3. Sets of parameters used for the bump simulations 1192

1131 Let  $R_0 = 10\mu\text{m}$  be the initial radius of the cell, then  $P^Y = \frac{w}{R_0 \cos(\pi/6)} E \varepsilon^Y$  is a representative value for the yield turgor of a 1194  
 1132 hexagonal cell. However we have observed that the effective threshold pressure is approximately twice lower in multicellular 1195  
 1133 tissues and we have adapted the value of  $E$  accordingly: we choose  $E$  such that  $P^Y = 0.5$  MPa and multiplied this value by 1196  
 1134 two to obtain a an order of magnitude for the initial turgor of the cell close to the target value 0.5 MPa. The value  $\varepsilon^Y = 0.1$  is 1197  
 1135 chosen accordingly to experimental observations where wall deformations can be of the order of 10%. We choose two values for 1198  
 1136  $P^M$ : 0.55 MPa close to the threshold, and 0.7 MPa. Finally, we can use the Lockhart's prediction  $\dot{\gamma}^*$  (Eq.6 from main text) as 1199  
 1137 an order of magnitude of the relative growth rate; we choose  $\dot{\gamma}^* = 2\% \cdot \text{h}^{-1}$ . Then, a given value of  $\alpha^a$  (evaluated with  $R = R_0$ ) 1200  
 1138 sets a unique value of  $L^a$  and  $\phi^w$ . The table S1 recapitulates the sets of parameters used in this article, either with the control 1201  
 1139 parameters 1202

$$1141 \varepsilon^Y, P^M, P^Y, \dot{\gamma}^*, \alpha^a, \quad [S32] \quad 1203$$

1142 or equivalently with the actual parameters of the model 1204

$$1143 \varepsilon^Y, P^M, E, \Phi^w, L^a. \quad [S33] \quad 1206$$

1144 The correspondance has been obtained with  $R_0 = 6.5\mu\text{m}$ . 1207  
 1145  
 1146  
 1147

### 1148 References 1210

1149 1. Knoll DA, Keyes DE (2004) Jacobian-free newton-krylov methods: a survey of approaches and applications. *J Comp Phys* 1211  
 1150 193:357–397. 1212  
 1151

1152 1213  
 1153 1214  
 1154 1215  
 1155 1216  
 1156 1217  
 1157 1218  
 1158 1219  
 1159 1220  
 1160 1221  
 1161 1222  
 1162 1223  
 1163 1224  
 1164 1225  
 1165 1226  
 1166 1227  
 1167 1228  
 1168 1229  
 1169 1230  
 1170 1231  
 1171 1232  
 1172 1233  
 1173 1234  
 1174 1235  
 1175 1236  
 1176 1237  
 1177 1238  
 1178 1239  
 1240

1241  
1242  
1243  
1244  
1245  
1246  
1247  
1248  
1249  
1250  
1251  
1252  
1253  
1254  
1255  
1256  
1257  
1258  
1259  
1260  
1261  
1262  
1263  
1264  
1265  
1266  
1267  
1268  
1269  
1270  
1271  
1272  
1273  
1274  
1275  
1276  
1277  
1278  
1279  
1280  
1281  
1282  
1283  
1284  
1285  
1286  
1287  
1288  
1289  
1290  
1291  
1292  
1293  
1294  
1295  
1296  
1297  
1298  
1299  
1300  
1301  
1302

1303  
1304  
1305  
1306  
1307  
1308  
1309  
1310  
1311  
1312  
1313  
1314  
1315  
1316  
1317  
1318  
1319  
1320  
1321  
1322  
1323  
1324  
1325  
1326  
1327  
1328  
1329  
1330  
1331  
1332  
1333  
1334  
1335  
1336  
1337  
1338  
1339  
1340  
1341  
1342  
1343  
1344  
1345  
1346  
1347  
1348  
1349  
1350  
1351  
1352  
1353  
1354  
1355  
1356  
1357  
1358  
1359  
1360  
1361  
1362  
1363  
1364

**Table S1. Parameters used for the bump simulation (see Fig. 3 in main text). The top part of the table refers to the control parameters Eq. (S32), and the bottom part to the actual parameters Eq. (S32) used in the 2D model. The rightmost parameters after the vertical double bar are specific to multicellular models as they quantify the water conductivity between neighbour cells. The geometrical parameters are  $h = 10\mu\text{m}$  and  $w = h/20$ .**

| Control parameters | $\varepsilon^Y$ | $P^M$ (MPa) | $P_6^Y$ (MPa) | $\dot{\gamma}^*$ ( $\text{h}^{-1}$ )               | $\alpha^a$                                                     | $\alpha^s$                                                     |
|--------------------|-----------------|-------------|---------------|----------------------------------------------------|----------------------------------------------------------------|----------------------------------------------------------------|
| (REF)              | 0.1             | 0.7         | 0.5           | $2 \cdot 10^{-2}$                                  | 0.1                                                            | 0.9                                                            |
| (CC-)              | 0.1             | 0.7         | 0.5           | $2 \cdot 10^{-2}$                                  | 0.1                                                            | 0.1                                                            |
| (ALPHA+)           | 0.1             | 0.7         | 0.5           | $2 \cdot 10^{-2}$                                  | 0.9                                                            | 0.9                                                            |
| (PM-)              | 0.1             | 0.55        | 0.5           | $0.5 \cdot 10^{-2}$                                | 0.1                                                            | 0.9                                                            |
| Actual parameters  | $\varepsilon^Y$ | $P^M$ (MPa) | $E$ (MPa)     | $\Phi^w$ ( $\text{MPa}^{-1} \cdot \text{s}^{-1}$ ) | $L^a$ ( $\text{m} \cdot \text{MPa}^{-1} \cdot \text{s}^{-1}$ ) | $L^s$ ( $\text{m} \cdot \text{MPa}^{-1} \cdot \text{s}^{-1}$ ) |
| (REF)              | 0.1             | 0.7         | 112.6         | $2.8 \cdot 10^{-5}$                                | $8.7 \cdot 10^{-11}$                                           | $7.8 \cdot 10^{-10}$                                           |
| (CC-)              | 0.1             | 0.7         | 112.6         | $2.8 \cdot 10^{-5}$                                | $8.7 \cdot 10^{-11}$                                           | $9.6 \cdot 10^{-12}$                                           |
| (ALPHA+)           | 0.1             | 0.7         | 112.6         | $3.1 \cdot 10^{-6}$                                | $7.8 \cdot 10^{-10}$                                           | $7.0 \cdot 10^{-9}$                                            |
| (PM-)              | 0.1             | 0.55        | 112.6         | $2.8 \cdot 10^{-5}$                                | $8.7 \cdot 10^{-11}$                                           | $7.8 \cdot 10^{-10}$                                           |
